# Supplementary material for: Preparation and properties of polystyrene nanocomposites containing dumbbell-shaped molecular nanoparticles based on polyhedral oligomeric silsesquioxane and [60]fullerene
Source: Royal Society of Chemistry journal article supplement (doi:10.1039/c5ra13424b), 2015-01-01
Supplement: c5ra13424b1.pdf [file c5ra13424b1.pdf]

# Supporting Information for "Preparation and properties of polystyrene nanocomposites containing dumbbell-shaped molecular nanoparticles based on polyhedral oligomeric silsesquioxane and [60]fullerene"

Di Han,<sup>a</sup> Qing-Yun Guo,<sup>b</sup> Wen-Bin Zhang,<sup>b</sup> Liu-Xu Liu<sup>a</sup> and Qiang Fu<sup>\*a</sup>

<sup>a</sup> College of Polymer Science & Engineering, State Key Laboratory of Polymer Materials Engineering, Sichuan University, Chengdu 610065, P. R. China

<sup>b</sup> Key Laboratory of Polymer Chemistry & Physics of Ministry of Education, Center for Soft Matter Science and Engineering, College of Chemistry and Molecular Engineering, Peking University, Beijing 100871, P. R. China

## 1. <sup>13</sup>C NMR of BPOSS-MAL and POSS-C60

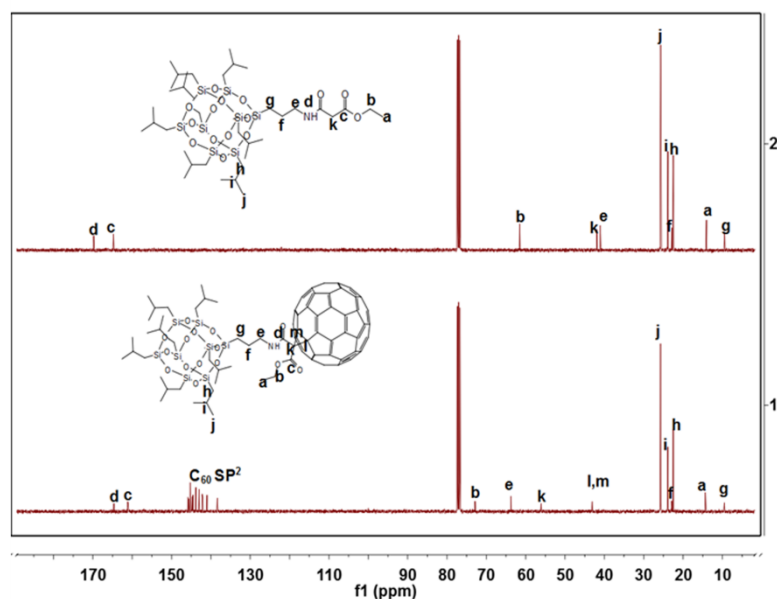

Figure S1. <sup>13</sup>C NMR spectrum of BPOSS-MAL and POSS-C60

## 2. FT-IR spectrum of BPOSS-MAL and POSS-C60

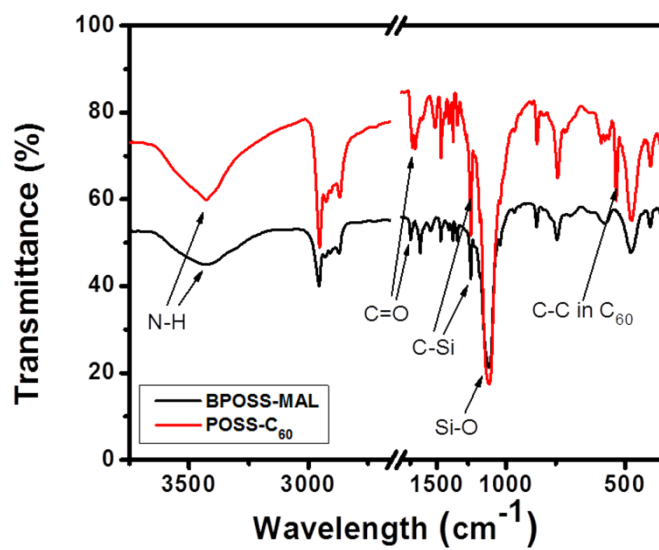

Figure S2. FT-IR spectrum of BPOSS-MAL and POSS-C<sub>60</sub>
